# Supplementary material for: Efficient organic–inorganic heterojunction structure for enhancing the photocatalytic activity of SubPc/Ti3C2Tx towards hydrogen production
Source: Royal Society of Chemistry journal article supplement (doi:10.1039/d4tc02937b), 2024-01-01
Supplement: d4tc02937b1.pdf [file d4tc02937b1.pdf]

# Efficient organic-inorganic heterojunction structure for enhancing the photocatalytic activity of SubPc /Ti<sub>3</sub>C<sub>2</sub>T<sub>x</sub> towards hydrogen production

Xiaoying Yu,<sup>a,b,c</sup> Tianfang Zheng,<sup>b</sup> Yuanlin Li,<sup>b</sup> Yanxiang Liu,<sup>b</sup> Ping Guo,<sup>\*a,c</sup> Hai-Hua Wang,<sup>\*b</sup> Shin-ichi Sasaki,<sup>\*d</sup> and Xiao-Feng Wang,<sup>\*b</sup>

<sup>a</sup>Key Laboratory of Groundwater Resources and Environment Ministry of Education, College of New Energy and Environment, Jilin University, Changchun 130012, P. R. China

<sup>b</sup>Key Laboratory of Physics and Technology for Advanced Batteries (Ministry of Education), College of Physics, Jilin University, Changchun 130012, P. R. China

<sup>c</sup> Jilin Provincial Key Laboratory of Water Resources and Environment, Jilin University, Changchun 130012, P. R. China

<sup>d</sup> Faculty of Bioscience, Nagahama Institute of Bio-Science and Technology, Nagahama, Shiga 526-0829, Japan

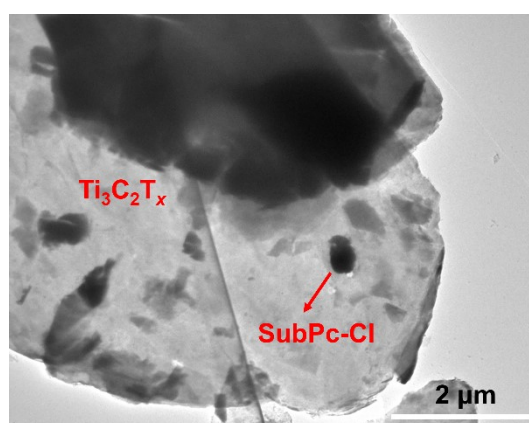

Fig.S1 The TEM image of the SubPc-Cl/Ti<sub>3</sub>C<sub>2</sub>T<sub>x</sub> heterojunction

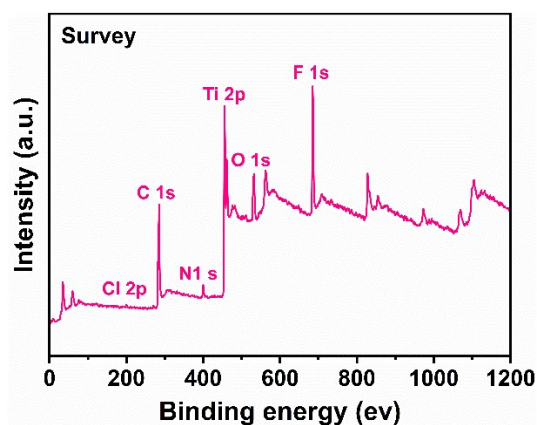

Fig.S2 XPS survey spectra of SubPc-Cl/Ti<sub>3</sub>C<sub>2</sub>T<sub>x</sub>

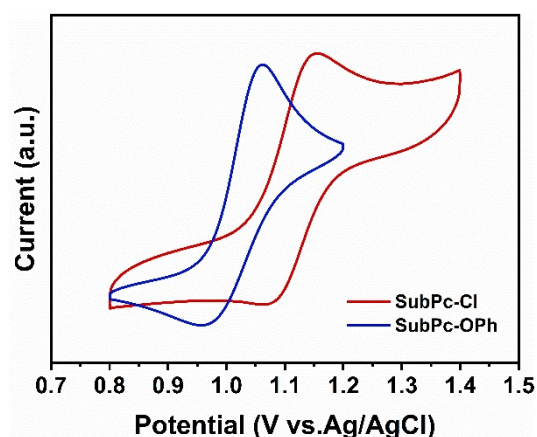

Fig.S3 CVs of SubPc-Cl and SubPc-OPh in CH<sub>2</sub>Cl<sub>2</sub> with 0.1 M TBAPF<sub>6</sub> as a supporting electrolyte at a scan rate of 100 mV/s (vs. Ag/AgCl).

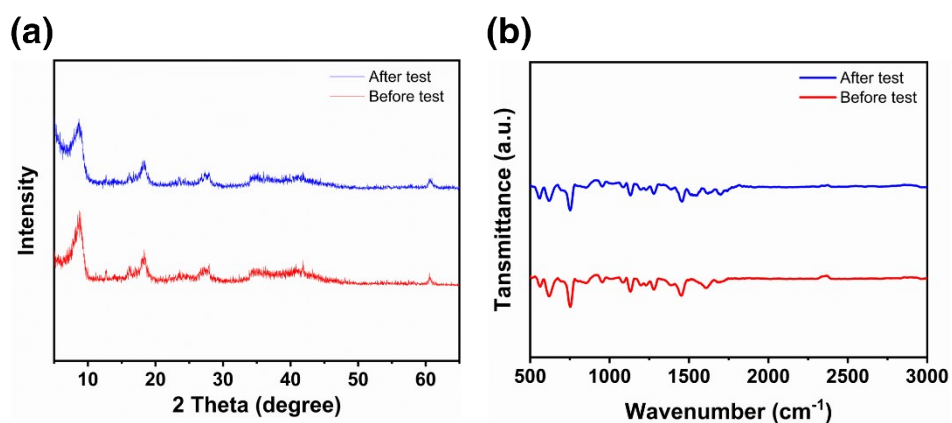

Fig.S4 The XRD and FT-IR spectra of the 2% SubPc-Cl/Ti<sub>3</sub>C<sub>2</sub>T<sub>x</sub> before and after the cycling experiments

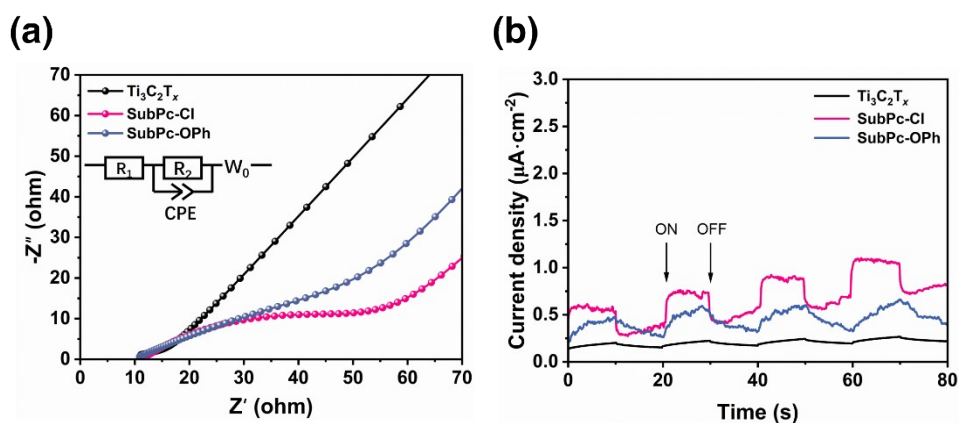

Fig.S5 The EIS Nyquist plots and TPC responses of pure SubPc (SubPc-Cl and SubPc-OPh) and  $\text{Ti}_3\text{C}_2\text{T}_x$  samples

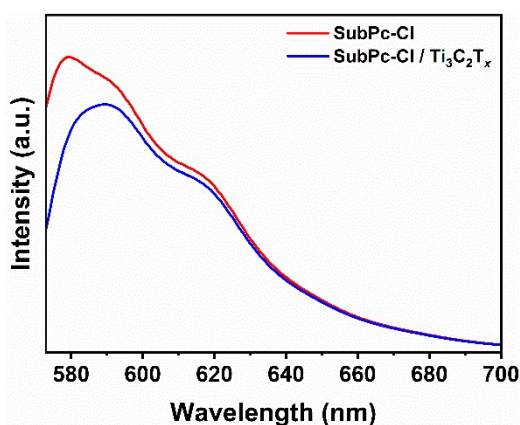

Fig.S6 The PL spectra of SubPc-Cl and SubPc-Cl/ $\text{Ti}_3\text{C}_2\text{T}_x$

Table S1. Comparison of Dye@MXene photocatalysts for hydrogen production

| Photocatalyst                            | Light-source     | Sacrificial reagent | $\text{H}_2$ production ( $\mu\text{mol g}^{-1} \text{h}^{-1}$ ) | Rrf.      |
|------------------------------------------|------------------|---------------------|------------------------------------------------------------------|-----------|
| SubPc/ $\text{Ti}_3\text{C}_2\text{T}_x$ | 350 W Xenon lamp | AA                  | 105.0                                                            | This work |
| Car@ $\text{Ti}_3\text{C}_2\text{T}_x$   | 350 W Xenon lamp | AA                  | 84.4                                                             | 1         |
| SQ@ $\text{Ti}_3\text{C}_2\text{T}_x$    | 350 W Xenon lamp | AA                  | 28.6                                                             | 2         |
| BChl@ $\text{Ti}_3\text{C}_2\text{T}_x$  | 350 W Xenon lamp | AA                  | 51.0                                                             | 3         |
| Chl@ $\text{Ti}_3\text{C}_2\text{T}_x$   | 350 W Xenon lamp | AA                  | $52 \pm 5$                                                       | 4         |

Table S2.  $\text{H}_2$  production ( $\mu\text{mol g}^{-1} \text{h}^{-1}$ )

| Mass ratio with $\text{Ti}_3\text{C}_2\text{T}_x$ (%) | SubPc-Cl | SubPc-Oph |
|-------------------------------------------------------|----------|-----------|
| 0.5                                                   | 50.0     | 23.0      |
| 2                                                     | 105.0    | 92.0      |
| 4                                                     | 80.0     | 56.0      |

|   |      |      |
|---|------|------|
| 8 | 41.0 | 33.0 |
|---|------|------|

Table S3. Cycling test results of SubPc-Cl/Ti<sub>3</sub>C<sub>2</sub>T<sub>x</sub> photocatalyst

| H <sub>2</sub> production of 2% SubPc-Cl/Ti <sub>3</sub> C <sub>2</sub> T <sub>x</sub> |        |
|----------------------------------------------------------------------------------------|--------|
| Run1                                                                                   | 419.84 |
| Run2                                                                                   | 402.33 |
| Run3                                                                                   | 380.62 |
| Run4                                                                                   | 350.81 |
| Run5                                                                                   | 340.14 |

## Reference

1. Y. Liu, Y. Li, Y.-T. Xu, H. Xu, Y. Gao, X.-F. Wang, R. Fujii and S. Sasaki, *J. Alloy. Compd.*, 2024, 997, 174798.
2. Y. Liu, Y. Li, A. Li, Y. Gao, X.-F. Wang, R. Fujii and S. Sasaki, *J. Colloid Interface Sci.*, 2023, 633, 218-225.
3. Y. Li, Y. Sun, Y. Liu, T. Zheng, A. Li, G. G. Levchenko, W. Han, A. V. Pashchenko, S. Sasaki, H. Tamiaki and X.-F. Wang, *J. Colloid Interface Sci.*, 2024, 654, 1001-1009.
4. Y. Li, X. Chen, Y. Sun, X. Meng, Y. Dall'Agnese, G. Chen, C. Dall'Agnese, H. Ren, S. Sasaki, H. Tamiaki and X.-F. Wang, *Adv. Mater. Interfaces*, 2020, 7, 1902080.
